# Supplementary material for: Gastrointestinal Involvement in Dermatomyositis
Source: MDPI journal article supplement (doi:10.3390/diagnostics12051200), 2022-05-11
Supplement: s1 [file s1]

**Table S1.** Characteristics of patients with DM and severe GI compromise from our unit at the Hospital Clínic de Barcelona and from the literature review. PubMed/Medline from April 1990 to April 2019. ATB: antibiotic; AZA: azathioprine; CYC: cyclophosphamide; CyA: cyclosporine; F: female; GI: gastrointestinal; IFX: infliximab; IIGV: intravenous immunoglobulines; M: male; (m): month; MPDN: methylprednisolone; MTX: methotrexate; N: no; NA: not available; PDN: prednisone; PPI: proton-pump inhibitor; Sx: surgery; Y: yes.

| Reference   | Date of Publication | Age | Sex | Age onset | Time from DM dx to onset of GI disease (m) | Disease activity |      |        | GI symptoms                                  | Endoscopic Appearance  | Histopathology                                                                             | Diagnosis                                    | Treatment         | Outcome |
|-------------|---------------------|-----|-----|-----------|--------------------------------------------|------------------|------|--------|----------------------------------------------|------------------------|--------------------------------------------------------------------------------------------|----------------------------------------------|-------------------|---------|
|             |                     |     |     |           |                                            | Muscle           | Skin | Others |                                              |                        |                                                                                            |                                              |                   |         |
| Swenson     | 1968                | 54  | F   | 34        | 240                                        | NA               | Y    | N      | Abdominal distention                         | .                      | .                                                                                          | Colonic distention                           | Sx                | Alive   |
| Oliveros    | 1973                | 12  | F   | 9         | 36                                         | Y                | N    | Y      | Abdominal pain                               | .                      | .                                                                                          | Pneumatosis intestinalis                     | MPDN + MTX        | Alive   |
| Fischer     | 1978                | 8   | F   | 8         | 9                                          | Y                | N    | NA     | Abdominal pain + fever + vomiting + diarrhea | .                      | Arterioles of muscle, nerve and GI tract with prominent endothelium and medial hypertrophy | Pneumatosis intestinalis                     | MPDN + MTX<br>ATB | Death   |
| Magill      | 1984                | 11  | F   | 11        | 3                                          | NA               | NA   | NA     | Abdominal pain + fever + vomiting            | .                      | .                                                                                          | Duodenum perforation                         | Sx + PDN          | Alive   |
| Magill      | 1984                | 15  | M   | 13        | 0,5                                        | NA               | NA   | NA     | Abdominal pain + fever + vomiting            | .                      | .                                                                                          | Duodenum perforation                         | Sx                | Death   |
| Schullinger | 1985                | 6   | F   | 6         | 10                                         | Y                | Y    | NA     | Abdominal pain                               | .                      | .                                                                                          | Duodenum perforation                         | Sx                | Alive   |
| Schullinger | 1985                | 10  | M   | 9         | 13                                         | NA               | NA   | NA     | Abdominal pain                               | .                      | .                                                                                          | Duodenum perforation                         | MPDN + Sx         | Alive   |
| Downey      | 1988                | 9   | M   | 9         | 7                                          | NA               | NA   | NA     | Abdominal pain                               | Esophageal perforation | .                                                                                          | Esophageal, duodenal and colonic perforation | Sx + PDN          | Alive   |
| Downey      | 1988                | 6   | F   | 6         | 5                                          | Y                | Y    | N      | Abdominal pain + fever                       | .                      | .                                                                                          | Duodenum perforation                         | Sx                | Death   |
| Downey      | 1988                | 5   | F   | 5         | 3                                          | Y                | Y    | NA     | Abdominal pain + pararectal mass             | .                      | .                                                                                          | Colonic perforation                          | Sx + PDN          | Alive   |

|              |      |    |   |    |     |    |    |    |                                              |                                                                   |                                                                                                |                                                 |                            |       |
|--------------|------|----|---|----|-----|----|----|----|----------------------------------------------|-------------------------------------------------------------------|------------------------------------------------------------------------------------------------|-------------------------------------------------|----------------------------|-------|
| Downey       | 1988 | 8  | F | 8  | 6   | Y  | Y  | N  | Abdominal pain                               | .                                                                 | .                                                                                              | Duodenum perforation                            | Sx                         | Alive |
| Wan-Yu Lin   | 1995 | 66 | M | 66 | 12  | Y  | Y  | Y  | (Acute) Abdominal pain                       | .                                                                 | .                                                                                              | Diverticular-like lesion with colon perforation | Sx                         | Death |
| Wakamatsu    | 1995 | 41 | F | 44 | 120 | Y  | Y  | NA | Abdominal pain + distention                  | .                                                                 | .                                                                                              | Pneumatosis intestinalis                        | .                          | Death |
| Dougenis     | 1996 | 57 | F | 57 | 6   | Y  | Y  | Y  | Abdominal pain + dysphagia + regurgitation   | .                                                                 | Necrosis and hemorrhage of esophagus and thinned muscle layer due to due to acute inflammation | Esophageal perforation                          | Sx                         | Alive |
| Stefanski    | 1998 | 7  | F | 7  | 3   | NA | NA | NA | Abdominal pain                               | .                                                                 | .                                                                                              | Pneumatosis intestinalis                        | Conservative               | .     |
| Takeda       | 1998 | 13 | F | 13 | 7   | Y  | Y  | Y  | .                                            | .                                                                 | Vessels occluded by fibrin thrombi, intimal hyperplasia and inflammatory infiltrates           | Esophageal and intestinal perforation           | Sx + CFM + Plasma Exchange | Death |
| Eshraghi     | 1998 | 24 | F | 24 | 3   | NA | NA | NA | Abdominal tenderness                         | Erosive esophagitis, gastric/duodenal ulcers, pyloric perforation | Ischemia caused by lymphocytic vasculitis and obliterative endarteritis                        | Duodenal and gastric perforation                | Sx + PDN + IVIG + CFM      | Alive |
| Laskin       | 1999 | 11 | M | 4  | 60  | NA | NA | NA | Abdominal pain + fever + vomiting + diarrhea | .                                                                 | .                                                                                              | Dilated atrophic esophagus                      | PDN + AZA + MTX            | Alive |
| Morris-Stiff | 1999 | 61 | F | 60 | 6   | Y  | Y  | NA | Vomiting + weight loss                       | Atrophic gastritis                                                | Pneumatosis cystoides intestinalis with a giant reaction around the gas-filled cysts           | Pneumatosis intestinalis                        | Conservative               | Alive |
| Wang         | 2001 | 4  | M | 4  | 2   | Y  | Y  | Y  | Abdominal pain + bile-stained vomiting       | .                                                                 | Perforation of the ischemic ulcerated duodenal                                                 | Duodenum perforation                            | Sx + MPDN                  | Alive |

|          |      |    |   |    |     |    |    |    |                                                       |                                                  |                                                                                |                                    |                          |       |  |
|----------|------|----|---|----|-----|----|----|----|-------------------------------------------------------|--------------------------------------------------|--------------------------------------------------------------------------------|------------------------------------|--------------------------|-------|--|
|          |      |    |   |    |     |    |    |    |                                                       |                                                  | mucosa with mononuclear cell infiltration                                      |                                    |                          |       |  |
| Marie    | 2001 | 18 | M | 18 | 4   | Y  | Y  | Y  | Abdominal pain + gastrointestinal bleeding            | Small ulcerations in stomach and duodenum        | Vasculitis                                                                     | GI bleeding due to vasculitis      | IVIG --> PDN + MTX       | Alive |  |
| Selva    | 2004 | 58 | F | 58 | 8   | Y  | Y  | NA | Fever                                                 | .                                                | .                                                                              | Pneumatosis intestinalis           | IFX + PDN + CYC + MTX    | Alive |  |
| Nosho    | 2005 | 69 | F | 59 | 120 | Y  | Y  | NA | Fever + abdominal distention                          | Polypoid lesions like submucosal tumors in ileum |                                                                                | Pneumatosis cystoides intestinalis | Conservative + Hiperoxia | Alive |  |
| Chen     | 2005 | 21 | F | 21 | 8   | Y  | Y  | N  | Abdominal distention                                  | .                                                | Vasculitis                                                                     | Vasculitis related-colon ischemia  |                          | Death |  |
| Tweezer  | 2006 | 19 | F | 19 | 1   | NA | NA | NA | Abdominal pain + diarrhea                             | Stomach erosions                                 | Inflammation of antral mucosa with prominent vascular ectasia                  | Enteritis                          | IVIG                     | Death |  |
| Tweezer  | 2006 | 30 | F | 30 | 3   | Y  | Y  | NA | Abdominal pain + gastrointestinal bleeding + diarrhea | Erosions, petechiae and fresh blood in colon     | Diffuse mucosal and submucosal inflammation + prominent vascular ectasia       | Pancolitis                         | IVIG + PDN               | Death |  |
| Tweezer  | 2006 | 46 | F | 46 | 7   | Y  | Y  | N  | Abdominal pain + diarrhea                             | Erosions, ulcers and fresh blood in colon        | Diffuse mucosal and submucosal inflammation + prominent vascular ectasia       | Enteritis and colitis              | MPDN                     | Alive |  |
| Mamyrova | 2007 | 15 | F | 11 | 4   | Y  | Y  | N  | Abdominal pain + bile-stained vomiting                | Esophagitis + shallow ulceration at g-e junction | Minimal inflammation in the submucosa, abnormally dilated vessels in submucosa | Enterocolitis                      | PDN + AZA --> IVIG       | Alive |  |
| Mamyrova | 2007 | 13 | F | 11 | 25  | Y  | Y  | N  | Abdominal pain + constipation                         | .                                                | Mucosal edema without evidence of mucosal ulceration, narrowing or complete    | Duodenum and colonic perforation   | Sx + MPDN + CFM + IVIG   | .     |  |

| Clinical presentation |      |     |     |          |        |          |                 |                |                                               | Histopathologic findings                                      |                 |                                                         |                                               |                          | Therapeutic approach          |         |          | Outcome |
|-----------------------|------|-----|-----|----------|--------|----------|-----------------|----------------|-----------------------------------------------|---------------------------------------------------------------|-----------------|---------------------------------------------------------|-----------------------------------------------|--------------------------|-------------------------------|---------|----------|---------|
| Case                  | Year | Age | Sex | Duration | Weight | Diarrhea | Rectal bleeding | Abdominal pain | Other symptoms                                | Colonoscopy                                                   | Small intestine | Stomach                                                 | Duodenum                                      | Rectum                   | Medical                       | Surgery | Response |         |
| Morita                | 2007 | 19  | M   | 19       | 6      | NA       | NA              | NA             | Abdominal pain                                | Ulcerations in duodenum                                       | .               | .                                                       | Duodenum perforation                          | Sx + PDN                 | .                             | .       | .        | Alive   |
| Al-Haddad             | 2007 | 56  | F   | 53       | 8      | NA       | Y               | NA             | Gastrointestinal bleeding                     | Esophagic diverticula bleeding                                | .               | .                                                       | Esophageal diverticula                        | Conservative + PPI       | .                             | .       | .        | Alive   |
| Saito                 | 2007 | 53  | F   | 49       | 48     | Y        | Y               | Y              | Dysphagia                                     | .                                                             | .               | .                                                       | Pneumatosis intestinalis                      | Conservative + hiperoxia | .                             | .       | .        | .       |
| Sibidian              | 2008 | 53  | F   | 51       | 240    | NA       | NA              | NA             | Abdominal pain                                | .                                                             | .               | .                                                       | Pneumatosis intestinalis                      | .                        | .                             | .       | .        | Death   |
| Xiao                  | 2008 | 30  | F   | 22       | 96     | N        | Y               | Y              | Abdominal distention + diarrhea + weight loss | .                                                             | .               | .                                                       | Pneumatosis intestinalis                      | KCl 10% + paraffin       | .                             | .       | .        | Alive   |
| Berard                | 2010 | 8   | F   | 8        | 1      | Y        | Y               | Y              | Abdominal distention                          | .                                                             | .               | .                                                       | Pneumatosis intestinalis                      | Conservative             | .                             | .       | .        | Alive   |
| Sagara                | 2012 | 59  | F   | 56       | 360    | Y        | Y               | Y              | Abdominal distention                          | .                                                             | .               | .                                                       | Pneumatosis intestinalis                      | Conservative             | .                             | .       | .        | Alive   |
| Sagara                | 2012 | 41  | F   | 21       | 240    | Y        | Y               | Y              | Abdominal pain + peristaltism                 | .                                                             | .               | Disrupted muscularis propia                             | Pneumatosis intestinalis                      | Sx                       | .                             | .       | .        | Death   |
| Lioger                | 2012 | 67  | F   | 66       | 12     | Y        | Y               | N              | Diarrhea                                      | .                                                             | .               | .                                                       | Vasculitis related-colon ischemia             | Sx                       | .                             | .       | .        | Alive   |
| Zarbalian             | 2013 | 51  | F   | 49       | 24     | NA       | NA              | NA             | Normal                                        | .                                                             | .               | Pneumatosis cystoides intestinalis without inflammation | Pneumatosis intestinalis                      | Sx                       | .                             | .       | .        | Alive   |
| Singh                 | 2014 | 10  | F   | 10       | 1      | Y        | Y               | NA             | Gastrointestinal bleeding                     | .                                                             | .               | .                                                       | GI bleeding                                   | .                        | .                             | .       | .        | Death   |
| Singh                 | 2014 | 11  | M   | 11       | 108    | N        | Y               | N              | Abdominal pain                                | .                                                             | .               | .                                                       | Intestinal perforation                        | .                        | .                             | .       | .        | Death   |
| Burgin                | 2014 | 32  | M   | 32       | 6      | Y        | Y               | NA             | Abdominal pain + fever + diarrhea             | .                                                             | .               | Disruption of crypt architecture                        | Malignant atrophic papulosis (Degos' disease) | ECULIZUMAB               | .                             | .       | .        | Death   |
| Our                   | 2015 | 10  | F   | 8        | 24     | NA       | NA              | N              | Refractory abdominal pain + oral intolerance  | Superficial erosions in esophagus, stomach and duodenum (1st) | .               | .                                                       | Vasculitis                                    | Duodenum perforation     | PDN + CYC + cloroquine + IVIG | .       | .        | Death   |

|                       |      |    |   |    |     |    |    |    |                                                             |                                                                                  |                                                                              |                            |                                             |       |
|-----------------------|------|----|---|----|-----|----|----|----|-------------------------------------------------------------|----------------------------------------------------------------------------------|------------------------------------------------------------------------------|----------------------------|---------------------------------------------|-------|
| Our                   | 2015 | 68 | F | 68 | 6   | Y  | Y  | N  | Abdominal pain +<br>gastrointestinal bleeding<br>+ diarrhea | Superficial<br>erosions in<br>esophagus,<br>stomach and<br>duodenum (2–3°)       | Wall inner<br>muscular<br>atrophy with<br>fibrosis and<br>edema              | Esophageal<br>perforation  | Sx --> PDN +<br>IVIG                        | Death |
| Our                   | 2015 | 46 | F | 15 | 372 | Y  | Y  | Y  | Abdominal pain +<br>gastrointestinal bleeding               | Multiple ulcers in<br>duodenum                                                   | Duodenitis with<br>fibrosis of<br>lamina propria<br>and vascular<br>ectasia  | Duodenum<br>perforation    | MPDN + Plasma<br>Exchange + IVIG<br>--> AZA | Alive |
| Selva-<br>O'Callaghan | 2015 | 34 | F | 31 | 8   | Y  | N  | N  | Abdominal pain+<br>aphagya+ hematochezia                    | Antral ulcer +<br>hypervascular<br>colon mucosa<br>with fibrin-<br>covered ulcer | Chronic<br>inflammation,<br>capillary ectasia<br>with vascular<br>congestion | Gastric/colonic<br>ulcers  | MPDN + CYC +<br>IVIG                        | Alive |
| Kibbi                 | 2016 | 63 | F | 63 | 0   | Y  | Y  | Y  | Abdominal pain + bile-<br>stained vomiting                  | Multiple ulcers +<br>perforation of<br>transverse colon                          | Vasculitis                                                                   | Colonic<br>perforation     | PDN + IGIV--><br>Sx                         | Alive |
| Reanne Ju             | 2018 | 46 | F | .  | .   | NA | NA | NA | Dysphagia+ tarry stool                                      | Duodenal ulcers<br>and stigmata of<br>recent bleeding                            | Chronic<br>duodenitis                                                        | Aortoesophageal<br>fistula | Embolization                                | Death |

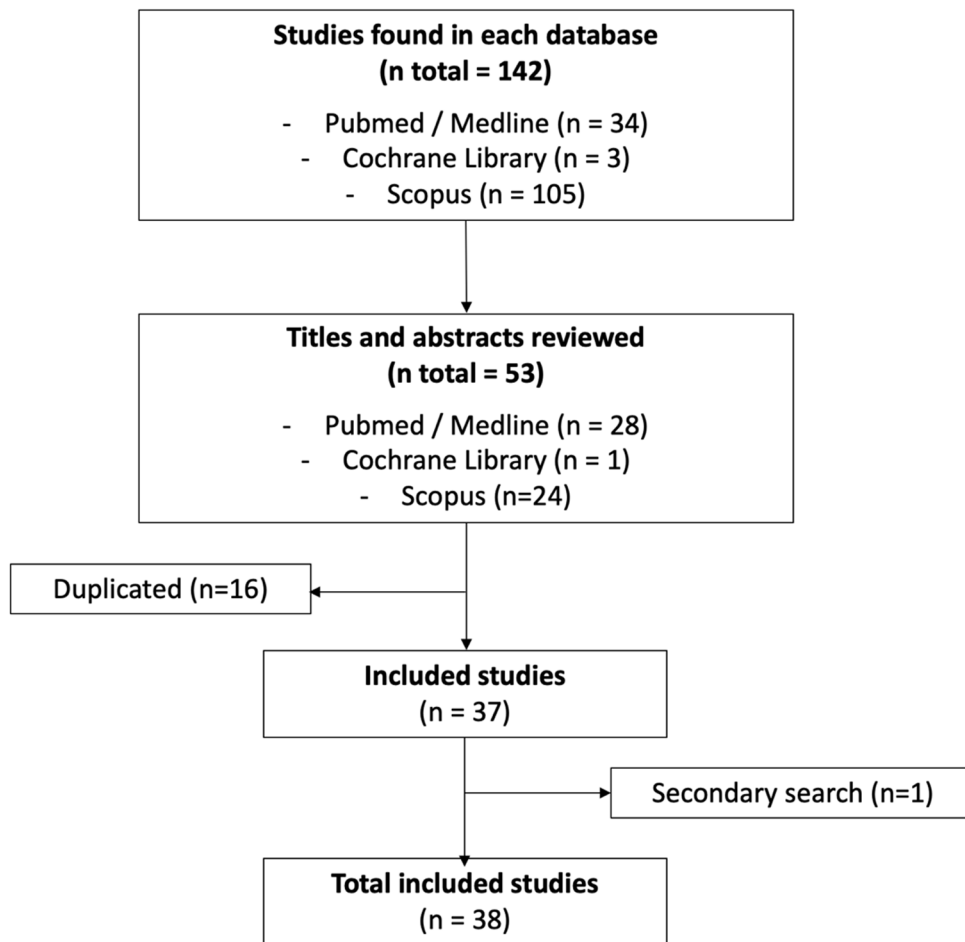

**Figure S1.** Flow diagram of studies selected included.
